# Supplementary material for: Association of Preoperative Visual Hallucinations With Cognitive Decline After Deep Brain Stimulation for Parkinson’s Disease
Source: Atypon-hosted journal article supplement (doi:10.1176/appi.neuropsych.20040077), 2020-11-18
Supplement: appi.neuropsych.20040077.ds001.pdf [file appi.neuropsych.20040077.ds001.pdf]

 


Psychiatry Online
