# Supplementary material for: Association of Preoperative Visual Hallucinations With Cognitive Decline After Deep Brain Stimulation for Parkinson’s Disease
Source: Atypon-hosted journal article supplement (doi:10.1176/appi.neuropsych.20040077), 2020-11-18
Supplement: appi.neuropsych.20040077.ds001.pdf [file appi.neuropsych.20040077.ds001.pdf]

**Supplementary Table S1. Preoperative Cognitive Results.**

| <b>Cognitive Domain</b> | <b>VH</b>   |           | <b>ICB</b>  |           | <b>All</b>  |           |
|-------------------------|-------------|-----------|-------------|-----------|-------------|-----------|
|                         | <b>Mean</b> | <b>SD</b> | <b>Mean</b> | <b>SD</b> | <b>Mean</b> | <b>SD</b> |
| Attention               | 51.44       | 6.84      | 49.76       | 7.64      | 50.78       | 6.63      |
| Executive Function      | 47.37       | 8.64      | 47.35       | 10.29     | 47.96       | 8.78      |
| Language                | 50.09       | 4.65      | 49.06       | 8.00      | 50.26       | 6.61      |
| Memory                  | 41.53       | 9.26      | 45.86       | 11.37     | 44.67       | 8.49      |
| Visuospatial            | 43.95       | 10.02     | 47.63       | 7.00      | 47.45       | 9.05      |

Results are reported as mean psychometric T scores (mean = 50, standard deviation = 10). No statistically significant differences ( $p < 0.05$ ) were found between VH yes/no condition or ICB yes/no condition by 2-sample t-test. Note that data for 'no' conditions for VH or ICB are not shown for clarity. VH = visual hallucinations, ICB = impulse control behaviors.

**Supplementary Table S2. Preoperative Cognitive Results by Target**

| <b>Cognitive Domain</b> | <b>STN</b>  |           | <b>GPi</b>  |           | <b>p-value</b> |
|-------------------------|-------------|-----------|-------------|-----------|----------------|
|                         | <b>Mean</b> | <b>SD</b> | <b>Mean</b> | <b>SD</b> |                |
| Attention               | 51.54       | 6.23      | 48.03       | 7.62      | 0.121          |
| Executive Function      | 49.99       | 7.25      | 40.87       | 10.24     | 0.0001*        |
| Language                | 51.13       | 5.84      | 47.21       | 8.38      | 0.070          |
| Memory                  | 46.20       | 7.65      | 38.95       | 9.39      | 0.011*         |
| Visuospatial            | 49.43       | 7.98      | 40.06       | 9.31      | 0.0002*        |

Results are reported as mean psychometric T scores (mean = 50, standard deviation = 10).

\*Indicates significant difference by 2-sample t-test. STN = subthalamic nucleus, GPi = globus pallidus internus, SD = standard deviation.

**Supplementary Table S3. Postoperative Changes in Cognition Across Entire Cohort**

| <b>Cognitive Domain</b> | <b>Preoperative</b> |           | <b>Postoperative</b> |           | <b>Diff</b> | <b>p-value</b> |
|-------------------------|---------------------|-----------|----------------------|-----------|-------------|----------------|
|                         | <b>Mean</b>         | <b>SD</b> | <b>Mean</b>          | <b>SD</b> |             |                |
| Attention               | 50.80               | 6.70      | 50.44                | 7.16      | -0.36       | 0.685          |
| Executive Function      | 48.11               | 8.79      | 44.47                | 9.77      | -3.64       | 0.0001*        |
| Language                | 50.25               | 6.67      | 48.20                | 7.29      | -2.05       | 0.001*         |
| Memory                  | 44.67               | 8.49      | 44.60                | 9.36      | -0.07       | 0.956          |
| Visuospatial            | 47.45               | 9.05      | 48.12                | 9.27      | +0.67       | 0.442          |

Results are reported in mean psychometric T scores (mean = 50, standard deviation = 10). p-values based on difference between pre- and post-DBS performance by paired t-test with a null hypothesis that there is no change ( $\Delta T=0$ ). \*Indicates significant difference by paired t-test. SD = standard deviation.

**Supplementary Table S4. Linear Regression Models of Postoperative Cognitive Changes as a Function of History of VH Excluding Illusions**

| <b>Cognitive Domain</b> | <b>b</b> | <b>SE</b> | <b>p-value</b> |
|-------------------------|----------|-----------|----------------|
| Attention               | -2.75    | 1.96      | 0.167          |
| Executive Function      | -4.79    | 1.85      | 0.013*         |
| Language                | +0.60    | 1.35      | 0.659          |
| Memory                  | -1.89    | 2.64      | 0.479          |
| Visuospatial            | +1.11    | 1.99      | 0.580          |

\*Indicates statistically significant ( $p < 0.05$ ) difference in linear regression model. b = linear regression coefficient, SE = standard error.

**Supplementary Table S5. Linear Regression Models of Postoperative Cognitive Changes as a Function of History of VH (Both Including and Excluding Illusions) with Baseline Cognition as an Additional Covariate.**

| Cognitive Domain   | VH (including illusions) |      |         | VH (excluding illusions) |      |         |
|--------------------|--------------------------|------|---------|--------------------------|------|---------|
|                    | b                        | SE   | p-value | b                        | SE   | p-value |
| Attention          | -3.59                    | 1.78 | 0.050   | -2.29                    | 1.80 | 0.210   |
| Executive Function | -4.21                    | 1.77 | 0.021*  | -4.67                    | 1.88 | 0.017*  |
| Language           | +0.21                    | 1.25 | 0.868   | +0.65                    | 1.33 | 0.631   |
| Memory             | -4.49                    | 2.40 | 0.068   | -3.59                    | 2.54 | 0.165   |
| Visuospatial       | -1.69                    | 1.91 | 0.382   | -0.01                    | 1.91 | 0.995   |

\*Indicates statistically significant ( $p < 0.05$ ) difference in linear regression model. VH = visual hallucinations, b = linear regression coefficient, SE = standard error.

**Supplementary Table S6. Linear Regression Models of Postoperative Changes in Select Cognitive Tests a Function of History of VH.**

| <b>Test</b>                  | <b>b</b> | <b>SE</b> | <b>p-value</b> |
|------------------------------|----------|-----------|----------------|
| Trails Making Test-B         | -4.27    | 4.57      | 0.355          |
| Color-Word Interference Test | -5.27    | 3.37      | 0.125          |
| WASI-II Matrix Reasoning     | -5.48    | 3.11      | 0.085          |
| WASI-II Similarities         | +0.62    | 2.77      | 0.824          |
| RBANS Digit Span Forward     | -4.83    | 3.08      | 0.123          |
| F-A-S                        | -1.67    | 2.10      | 0.430          |
| WAIS Digit Span Backward     | -4.95    | 2.80      | 0.084          |
| WAIS Picture Completion      | +0.40    | 3.07      | 0.897          |

Surgical target and duration between NPT are included in the model as covariates. b = linear regression coefficient, SE = standard error.
